# Supplementary material for: Diagnosing Appendicitis with Precision: A Comparative Analysis of Modified Alvarado and RIPASA Scoring Systems in a Northern Divisional Hospital of Bangladesh
Source: bioRxiv or medRxiv preprint supplement (doi:10.1101/2024.11.06.24316874), 2024-11-07
Supplement: Supplementary file [file media-1.pdf]

Supplementary figure

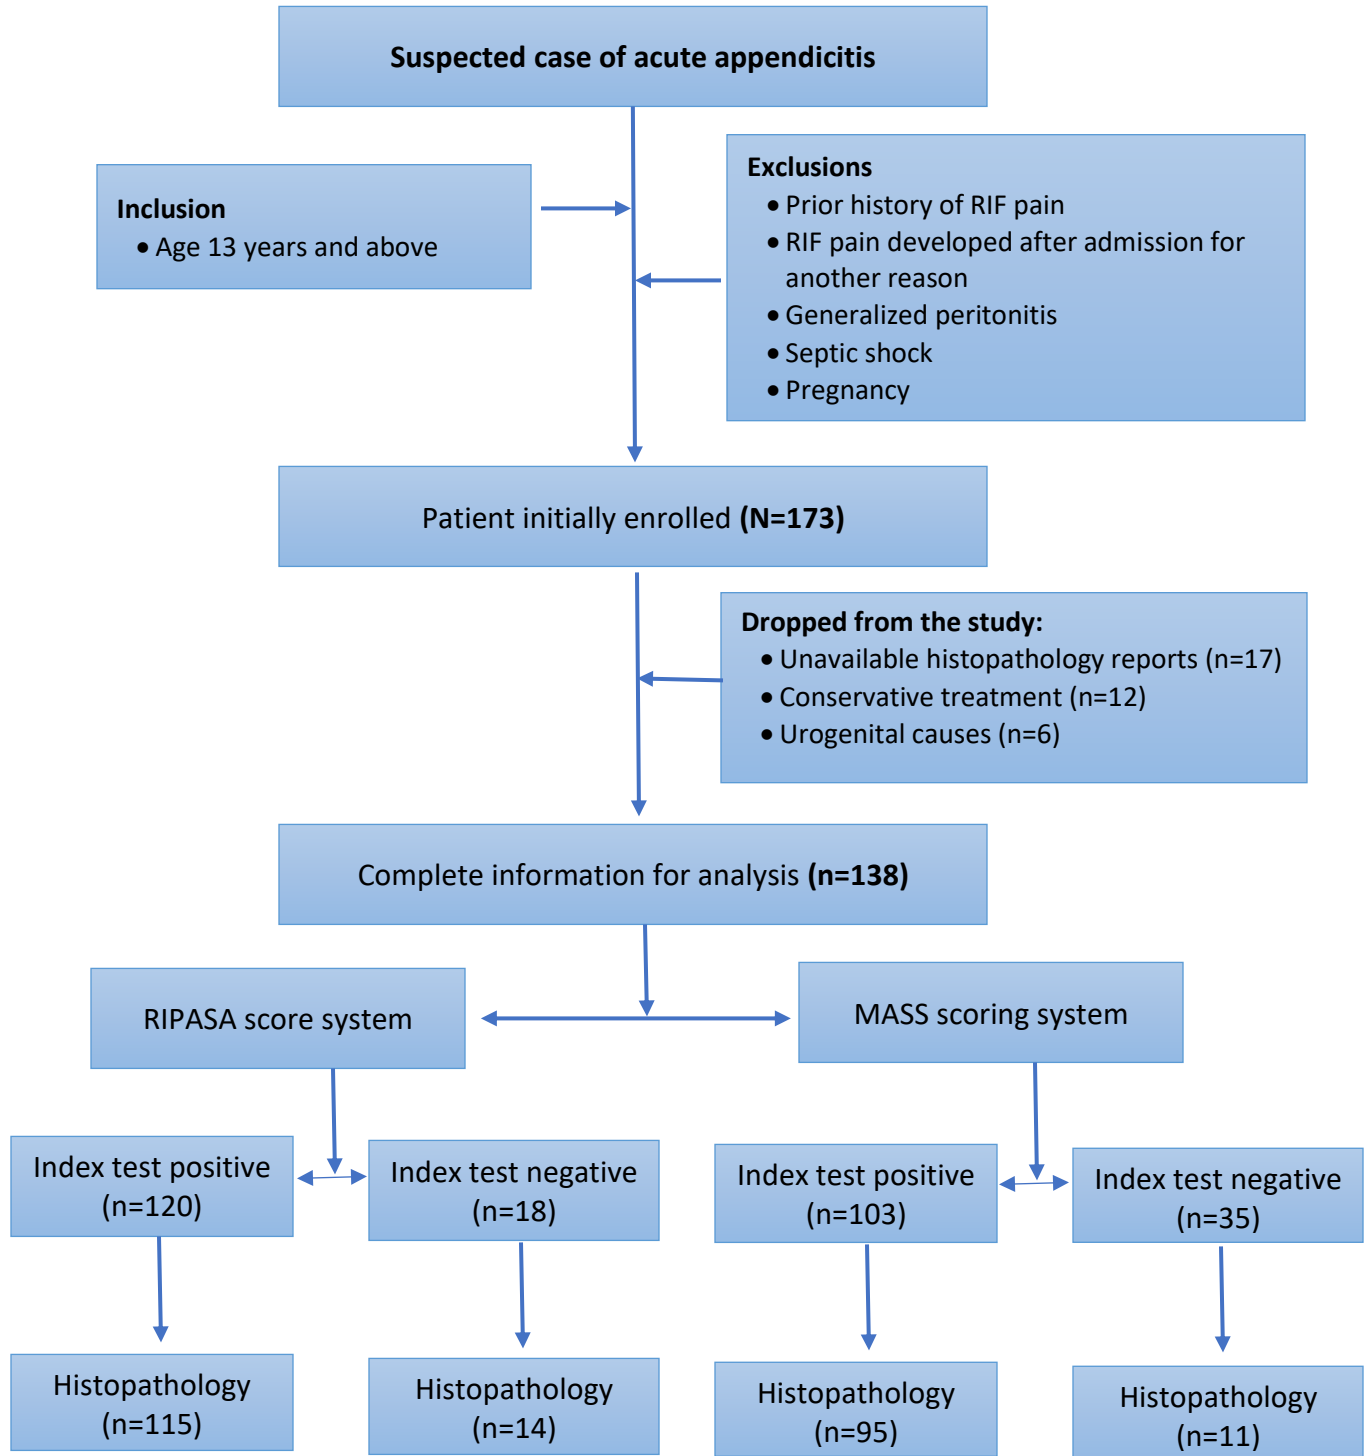

Supplementary figure 1: Flow diagram of participants

## Supplementary tables

Supplementary tables 1: Modified Alvarado Scoring System (MASS)

|            | <b>FEATURE</b>            | <b>SCORE</b> |
|------------|---------------------------|--------------|
|            | Migratory RIF pain        | 1            |
| Symptoms   | Anorexia                  | 1            |
|            | Nausea/ Vomiting          | 1            |
|            | Tenderness in RIF         | 2            |
|            | Rebound tenderness in RIF | 1            |
| Signs      | Elevated temperature      | 1            |
| Laboratory | Leukocytosis              | 2            |
|            | <b>TOTAL</b>              | <b>9</b>     |

Supplementary tables 2: Score distribution of RIPASA score system

| <b>PATIENT'S DEMOGRAPHIC</b>                | <b>SCORE</b> |
|---------------------------------------------|--------------|
| Female                                      | 0.5          |
| Male                                        | 1.0          |
| Age< 39.9years                              | 1.0          |
| Age> 40years                                | 0.5          |
| <b>SYMPTOMS</b>                             |              |
| RIF pain                                    | 0.5          |
| Pain migration to RIF                       | 0.5          |
| Anorexia                                    | 1.0          |
| Nausea & vomiting                           | 1.0          |
| Duration of symptoms <48hrs                 | 1.0          |
| Duration of symptoms >48hrs                 | 0.5          |
| <b>SIGNS</b>                                |              |
| RIF tenderness                              | 1.0          |
| Guarding                                    | 2.0          |
| Rebound tenderness                          | 1.0          |
| Rovsing's sign                              | 2.0          |
| Fever>37 <sup>0</sup> C, <39 <sup>0</sup> C | 1.0          |
| <b>INVESTIGATIONS</b>                       |              |
| Raised WBC count                            | 1.0          |
| Negative urinalysis                         | 1.0          |
| <b>ADDITIONAL SCORES</b>                    |              |
| Foreign NRIC                                | 1.0          |
